# Supplementary material
Source: ML conference proceedings conference paper supplement (https://openreview.net/forum?id=TERVhuQVTe)

relative error of  $\hat{d}_{\lambda,n}$  with respect to  $\hat{d}_{\lambda,10000}$

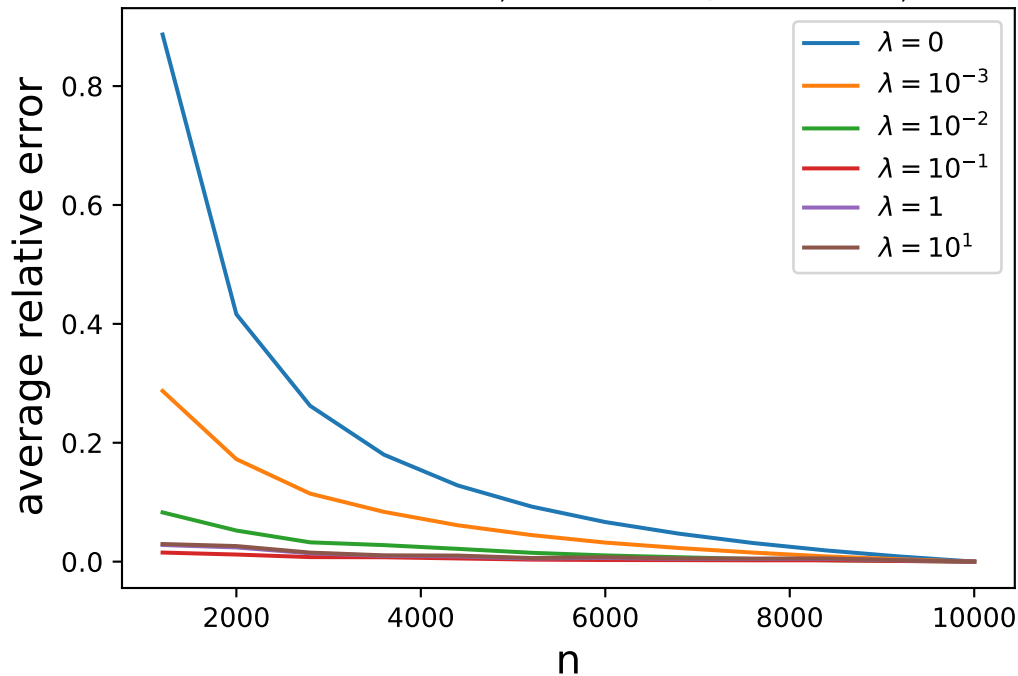

Supplement: supplementary_material [file attachment]

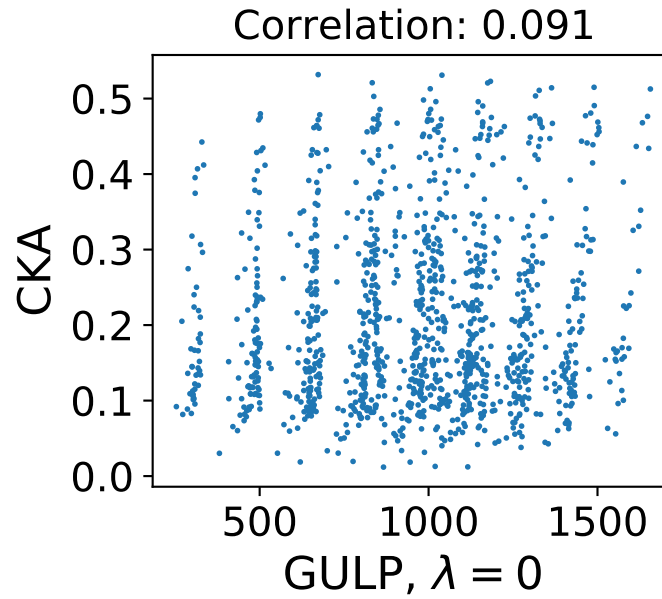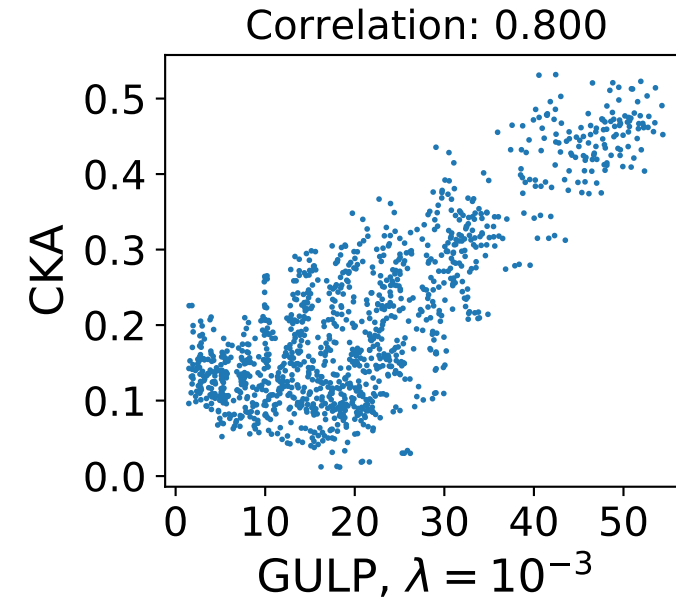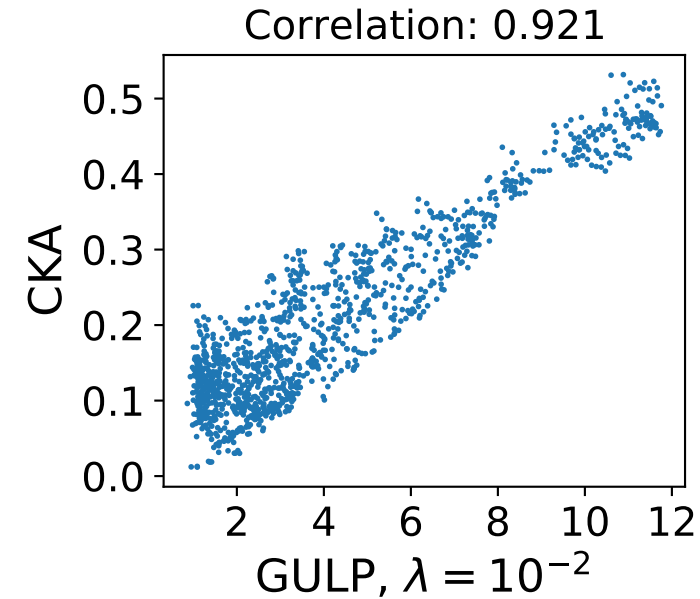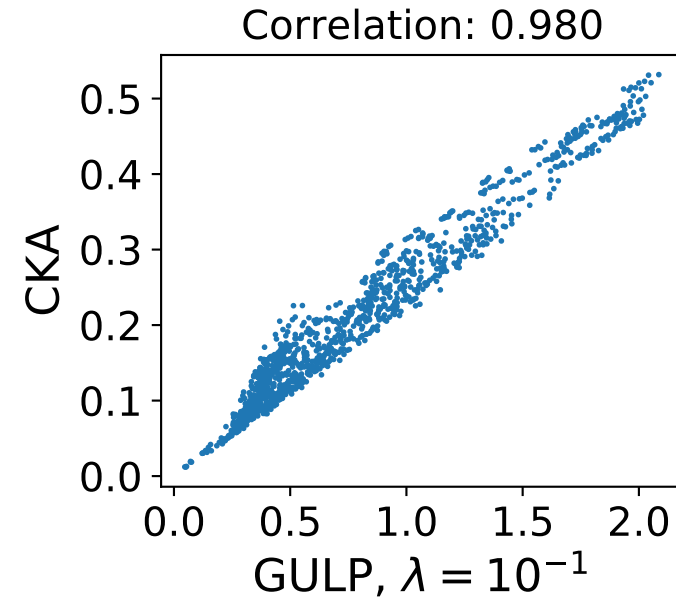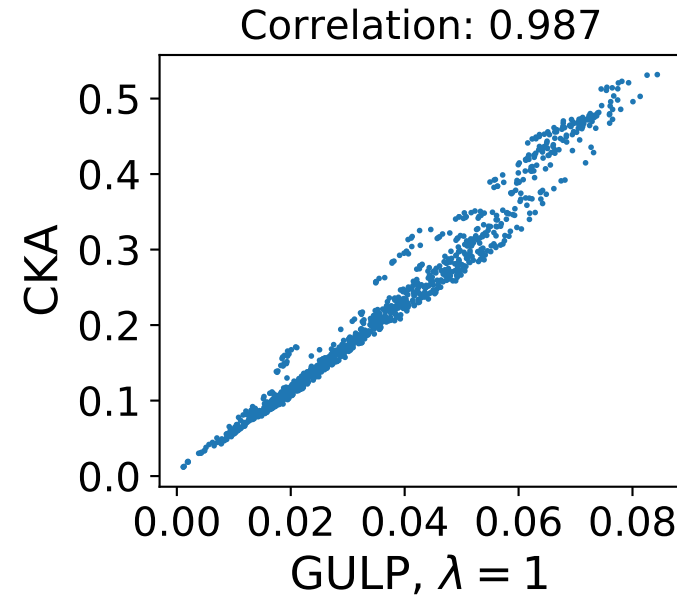

Supplement: supplementary_material [file attachment]

Correlation: 1.000

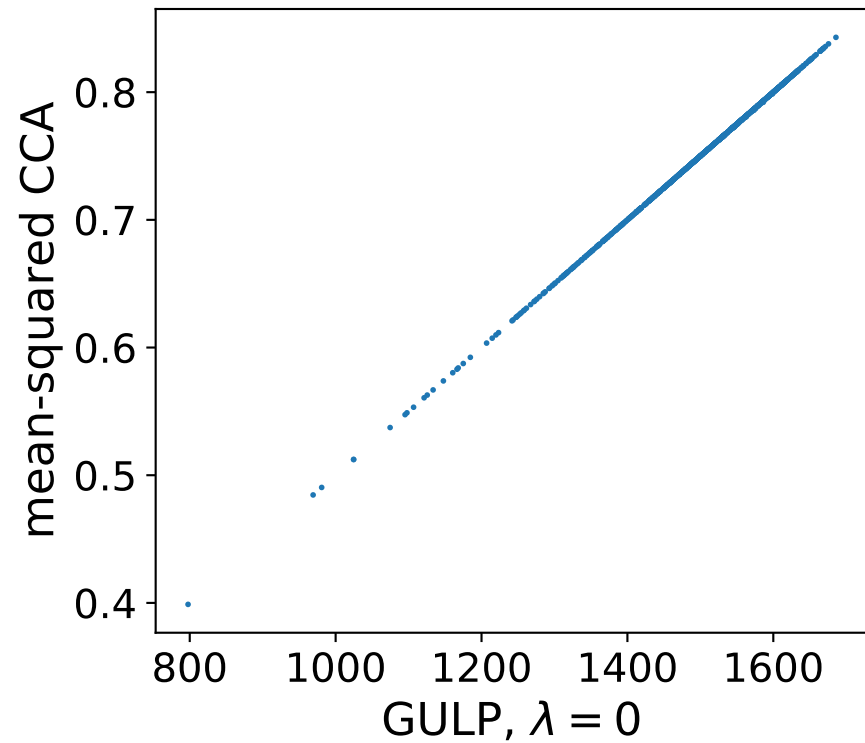

Correlation: 0.244

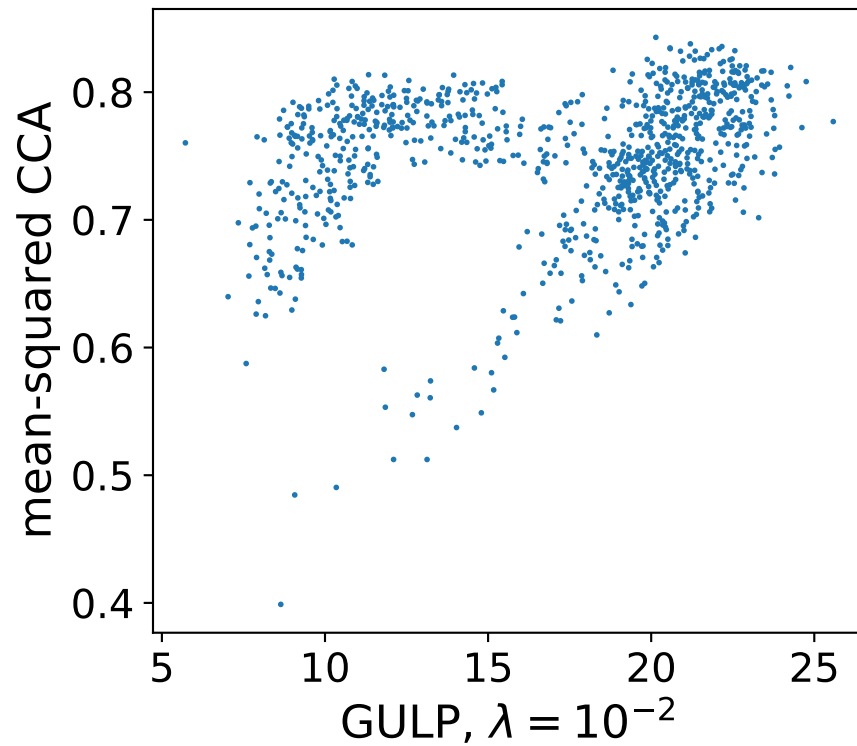

Correlation: 0.536

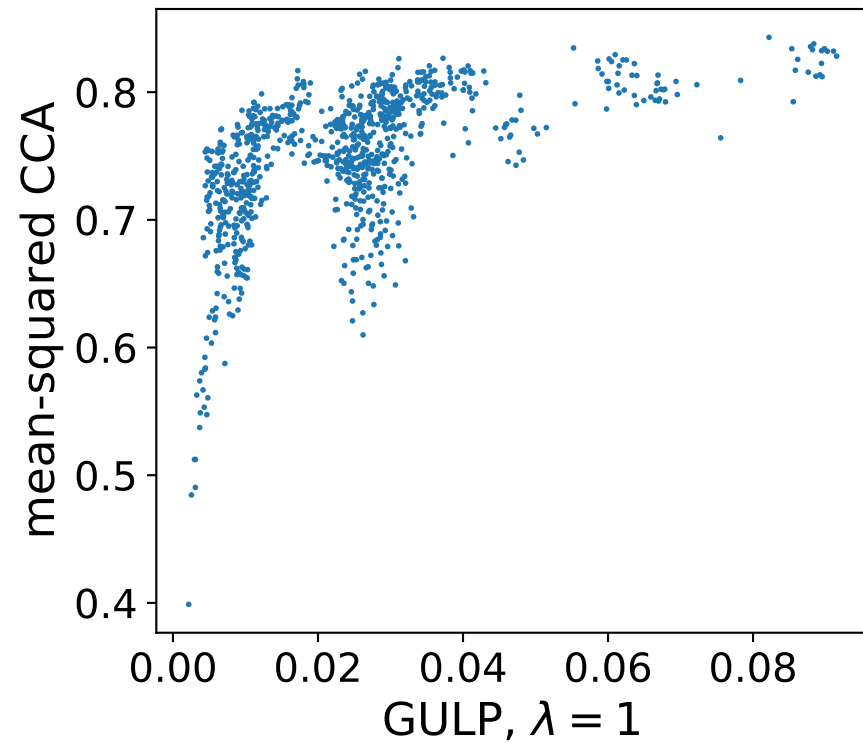

Supplement: supplementary_material [file attachment]

Correlation: 0.073

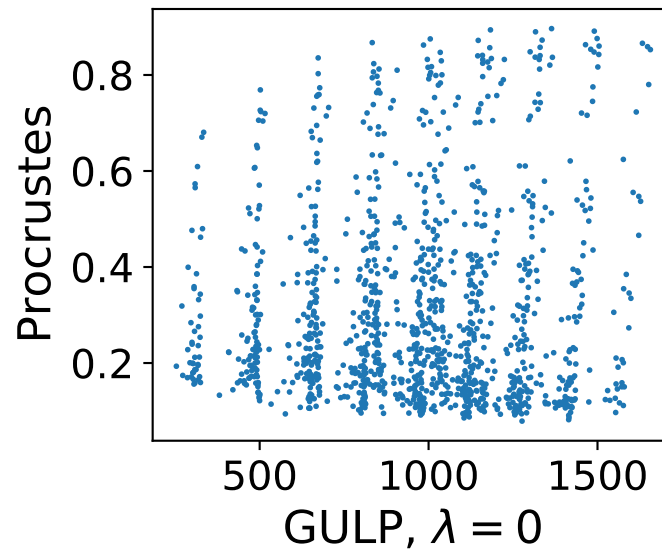

Correlation: 0.925

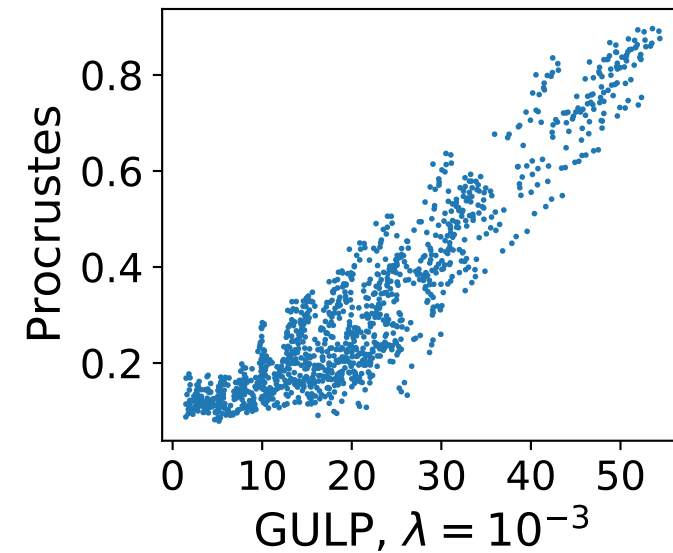

Correlation: 0.991

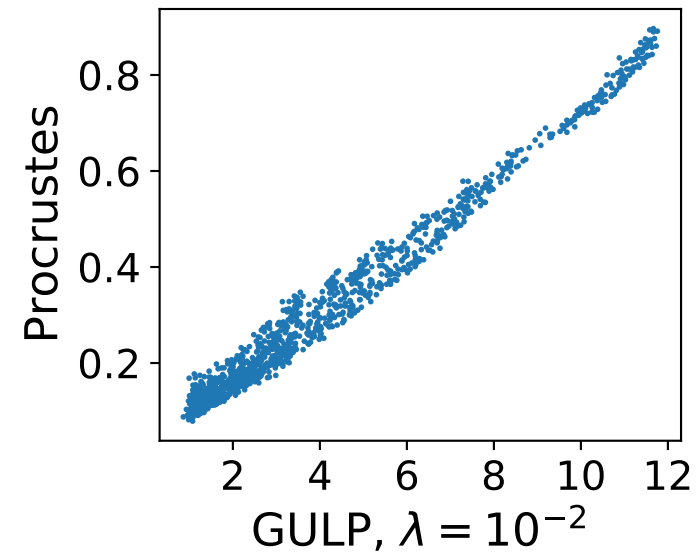

Correlation: 0.980

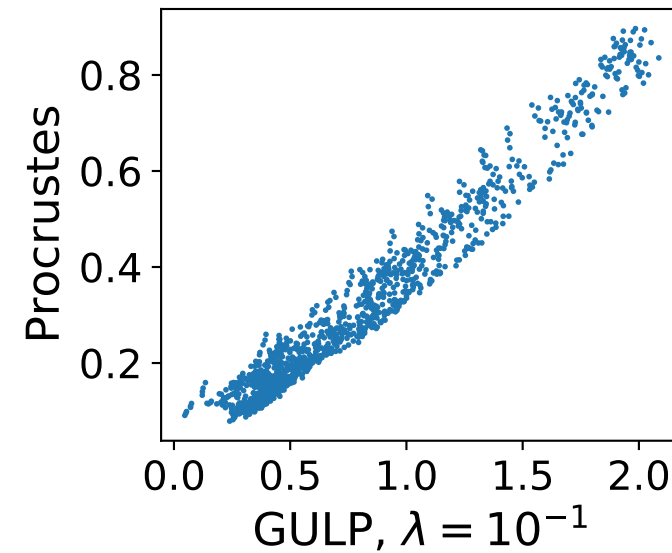

Correlation: 0.929

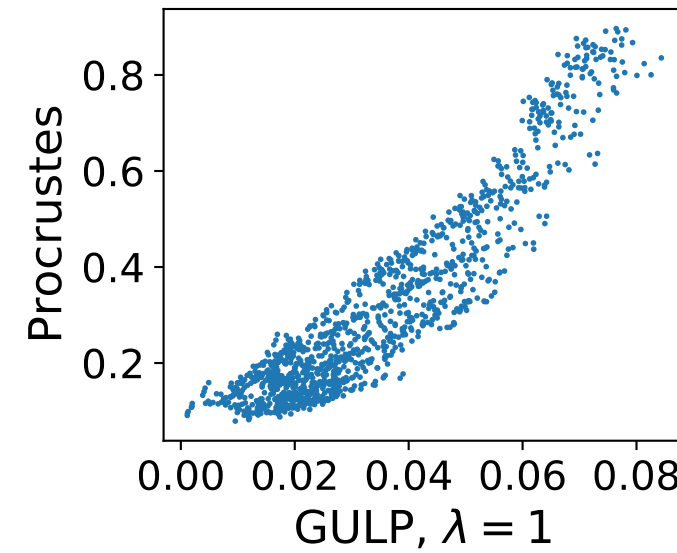

Supplement: supplementary_material [file attachment]

Correlation: 0.348

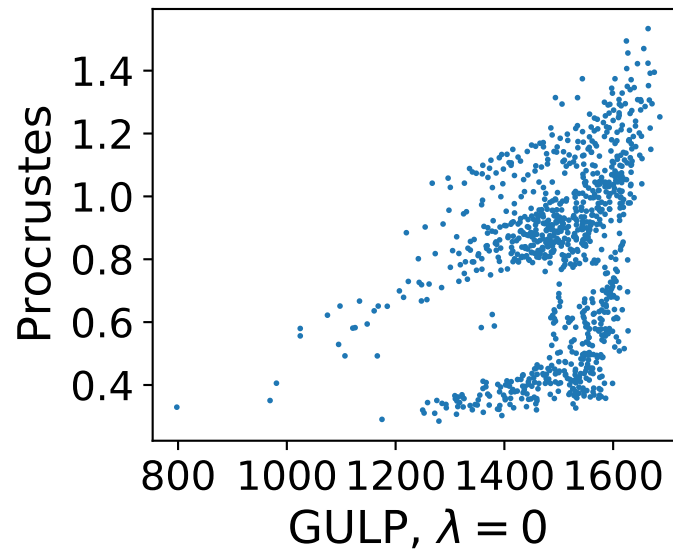

Correlation: 0.851

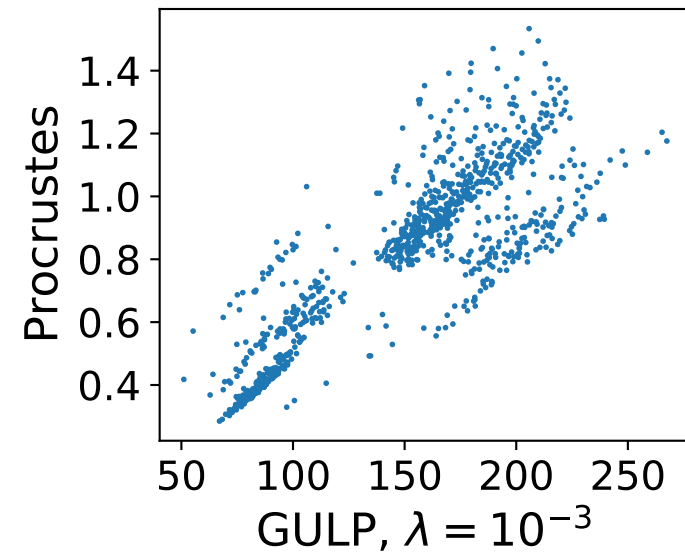

Correlation: 0.926

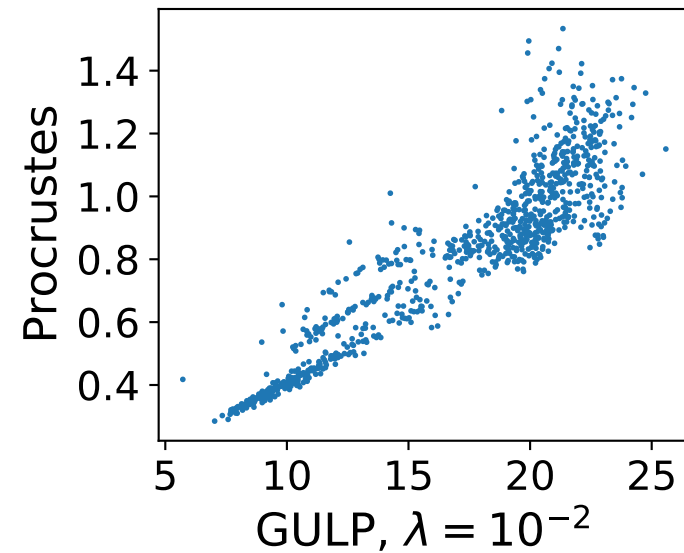

Correlation: 0.789

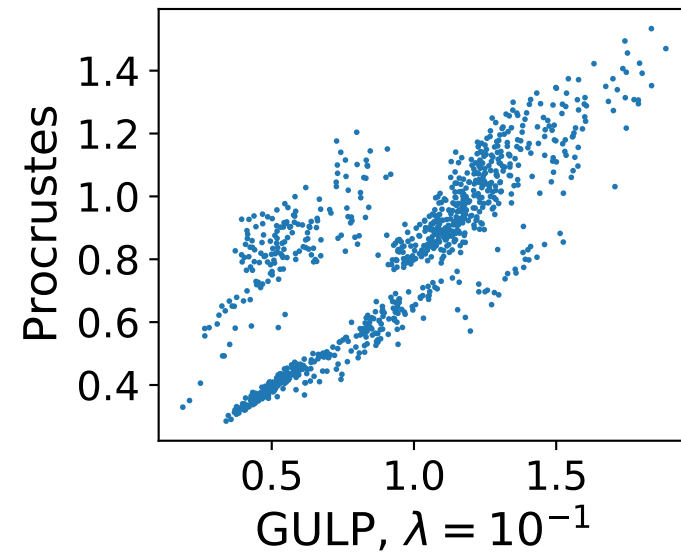

Correlation: 0.570

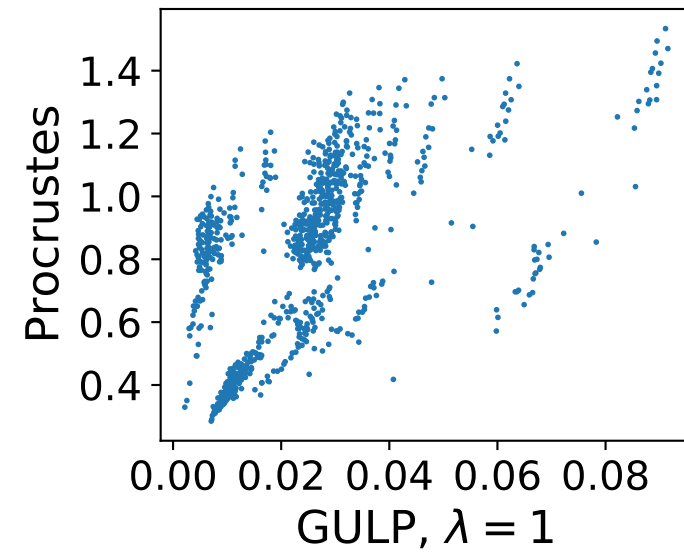

Supplement: supplementary_material [file attachment]

Average relative error between two independent estimates

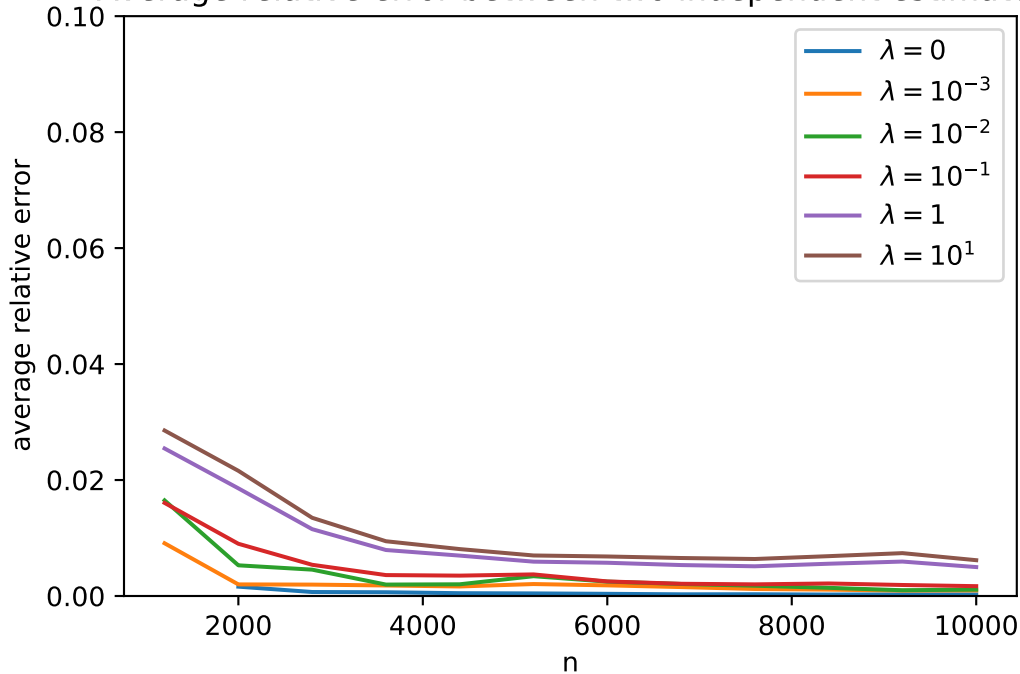

Supplement: supplementary_material [file attachment]

Correlation: 0.215

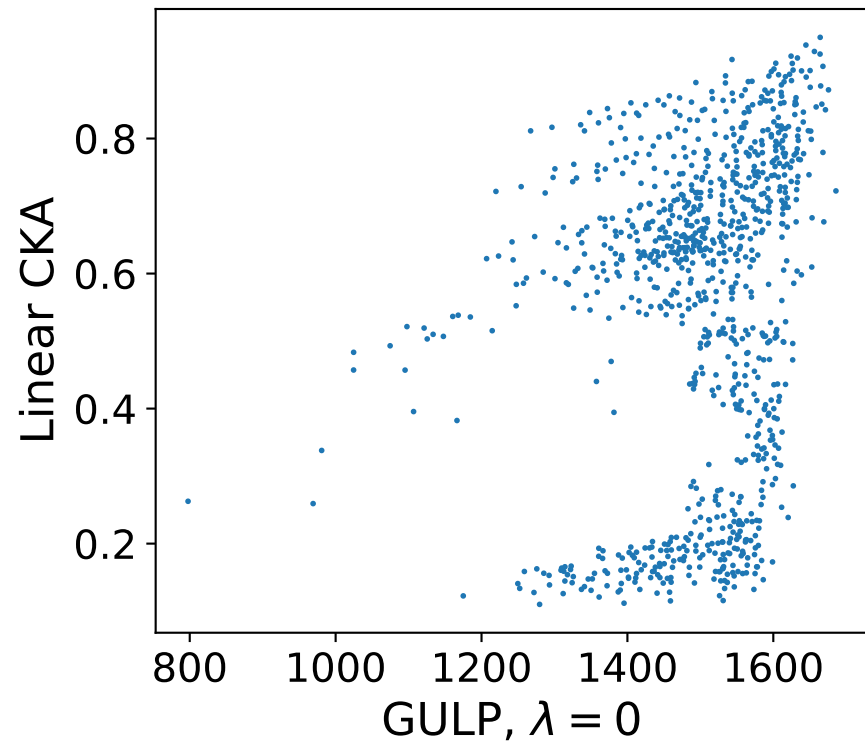

Correlation: 0.938

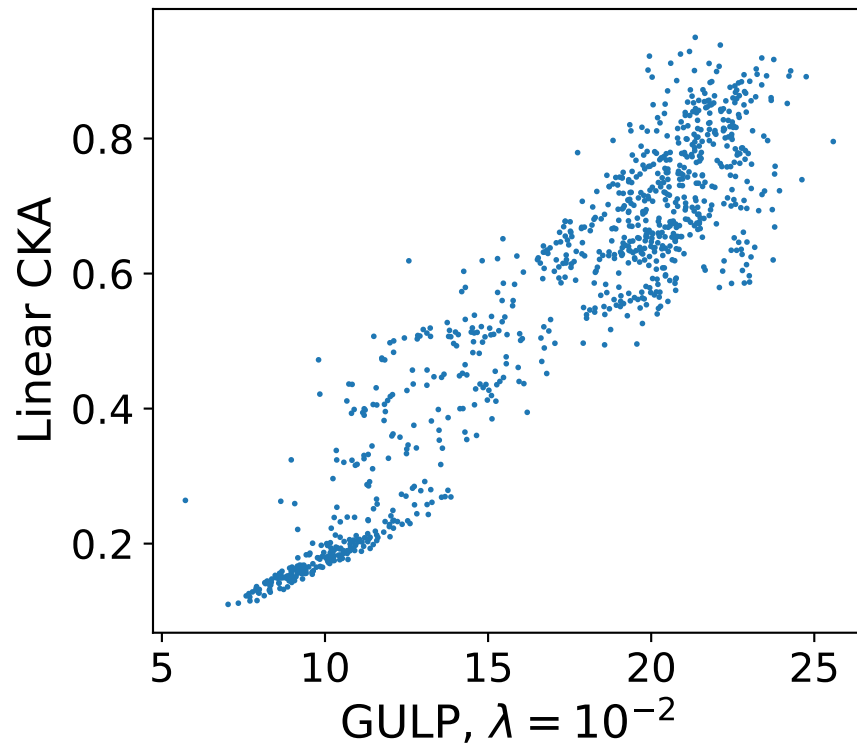

Correlation: 0.485

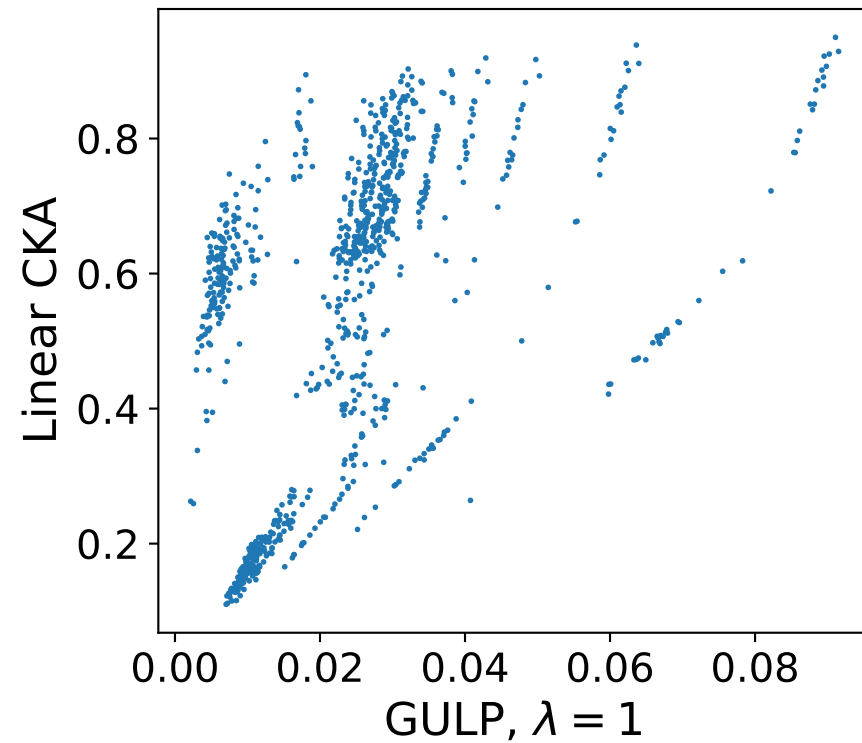

Supplement: supplementary_material [file attachment]

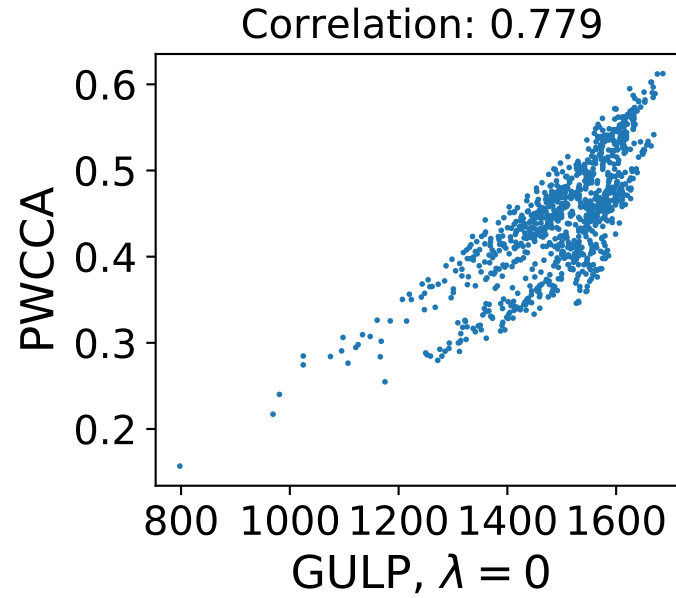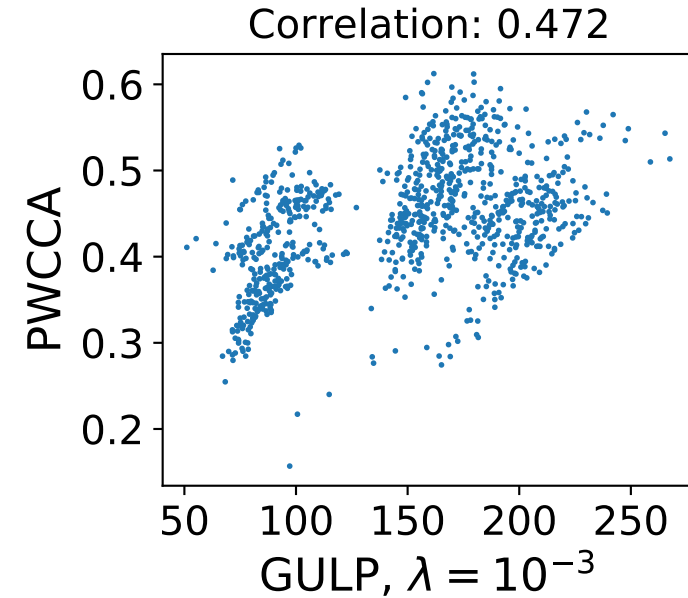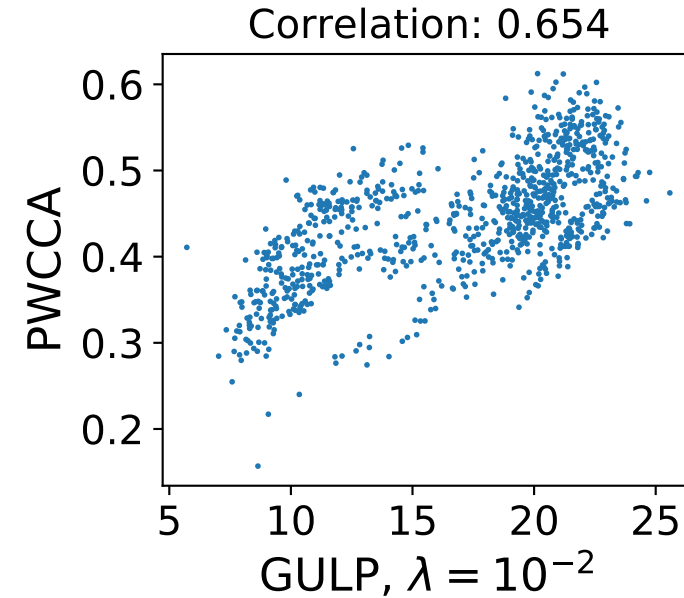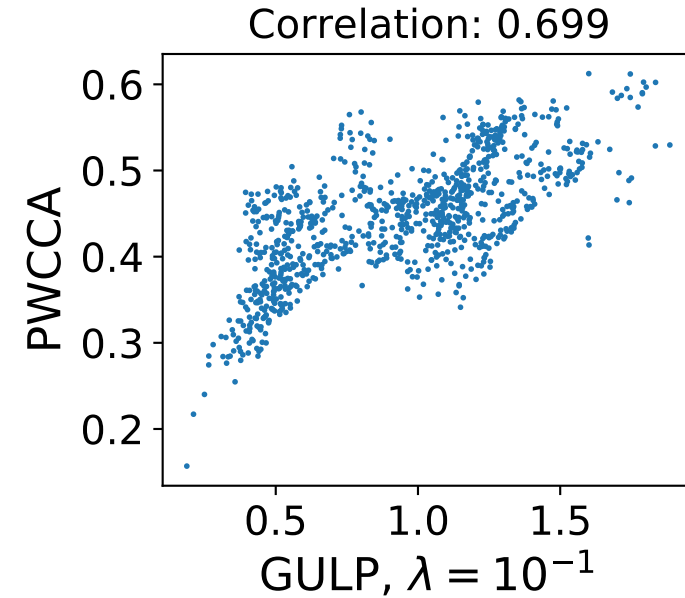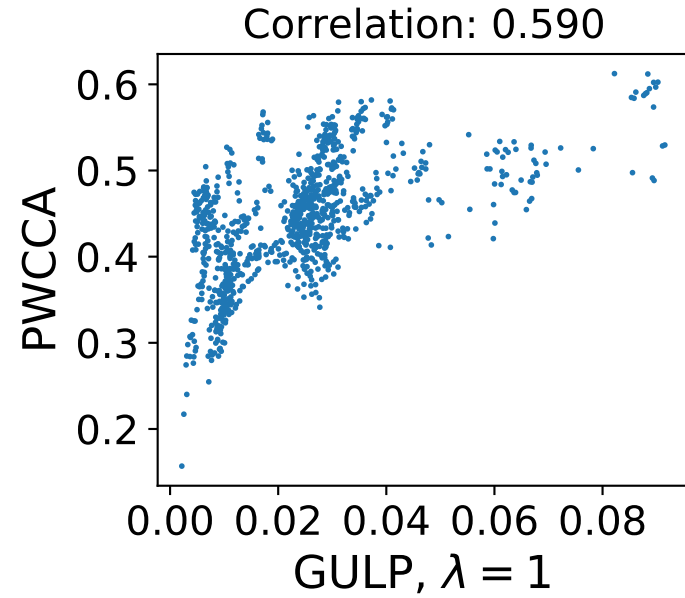

Supplement: supplementary_material [file attachment]

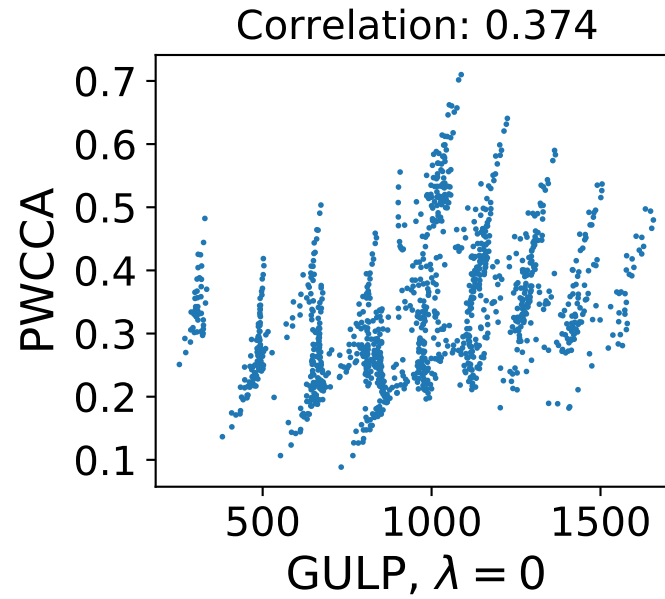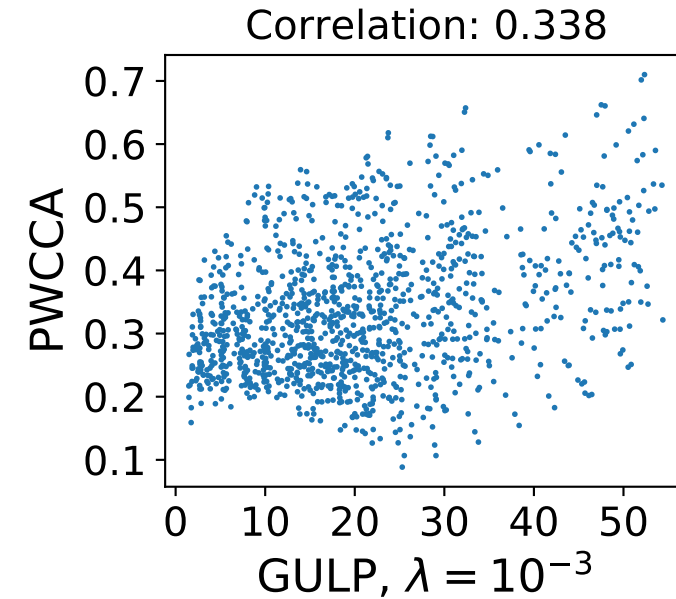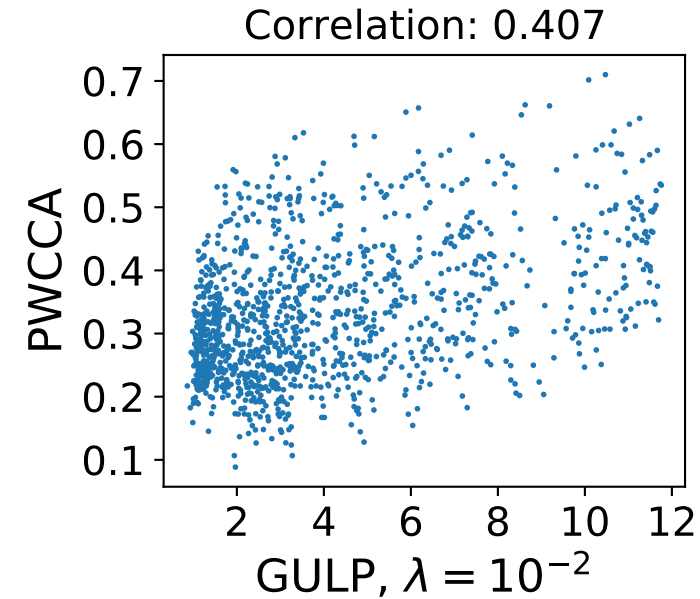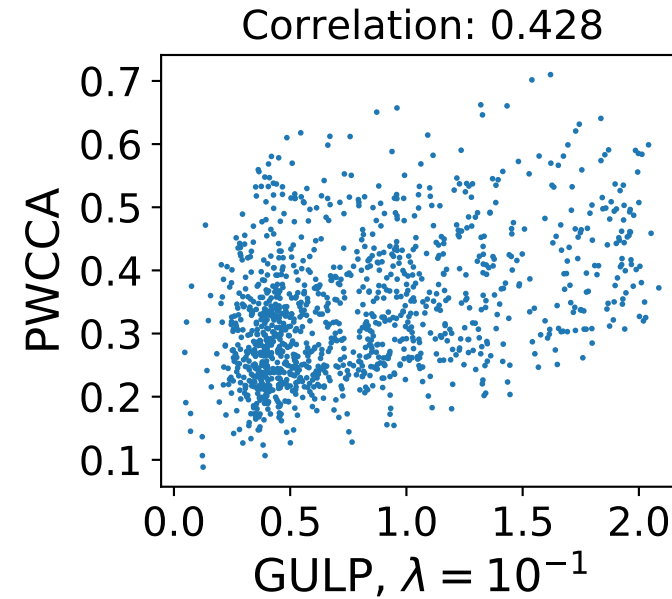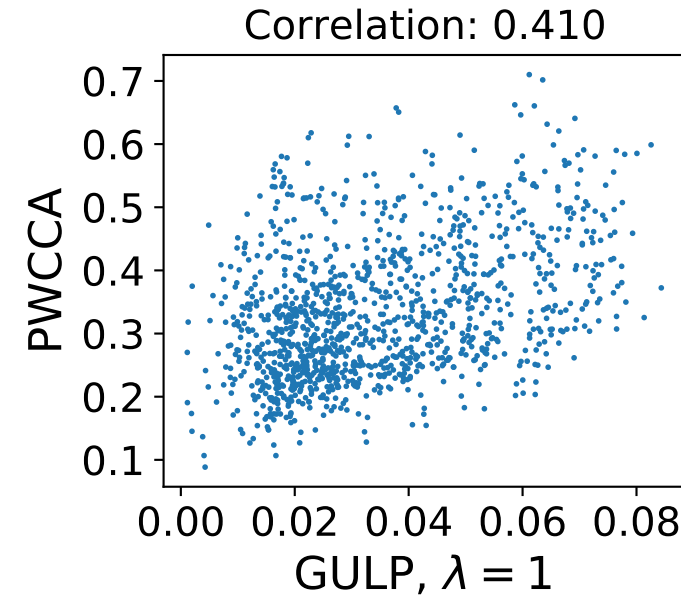

Supplement: supplementary_material [file attachment]

Correlation: 0.215

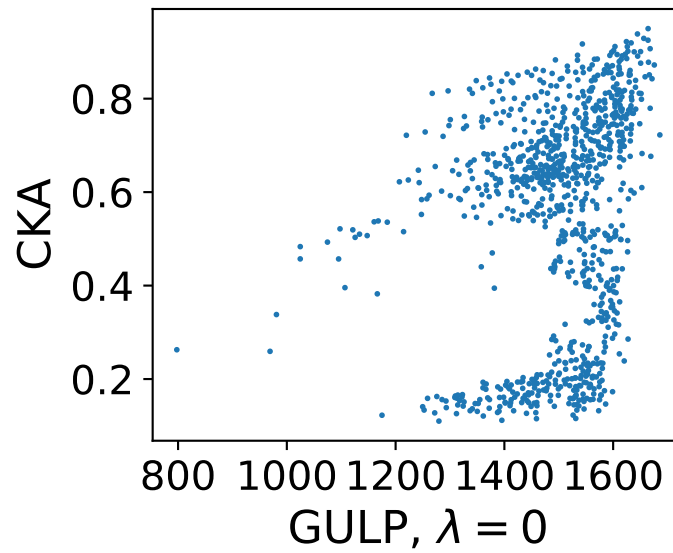

Correlation: 0.875

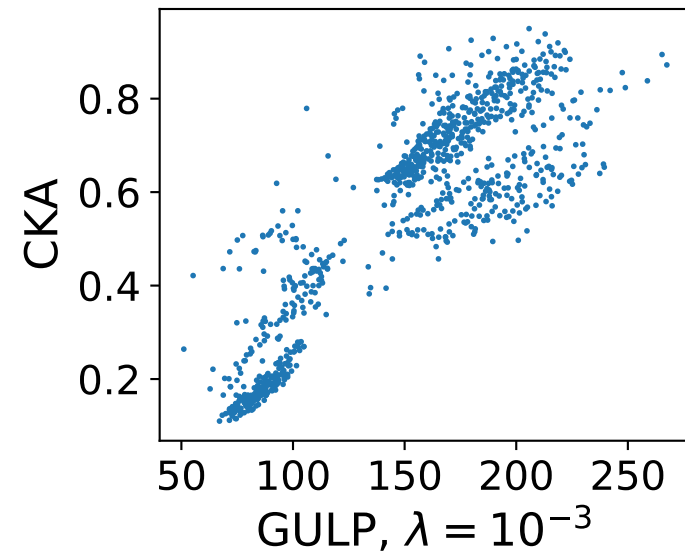

Correlation: 0.938

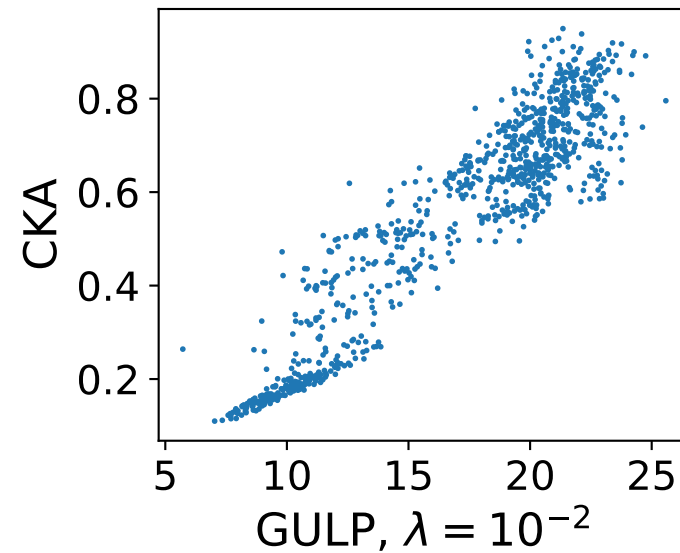

Correlation: 0.735

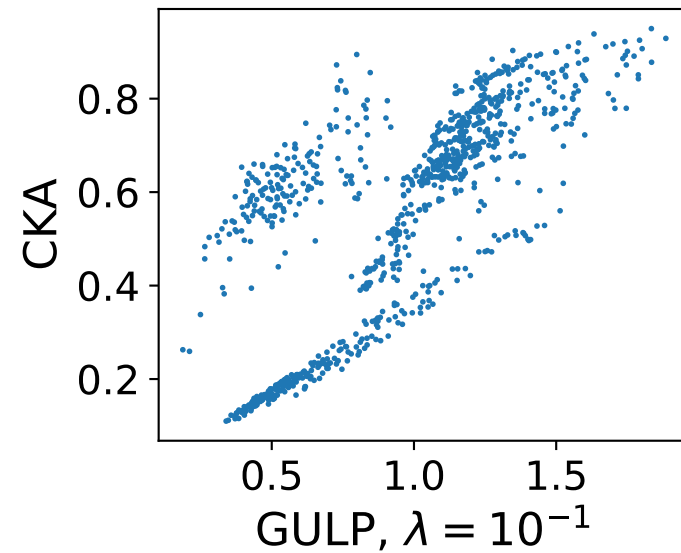

Correlation: 0.485

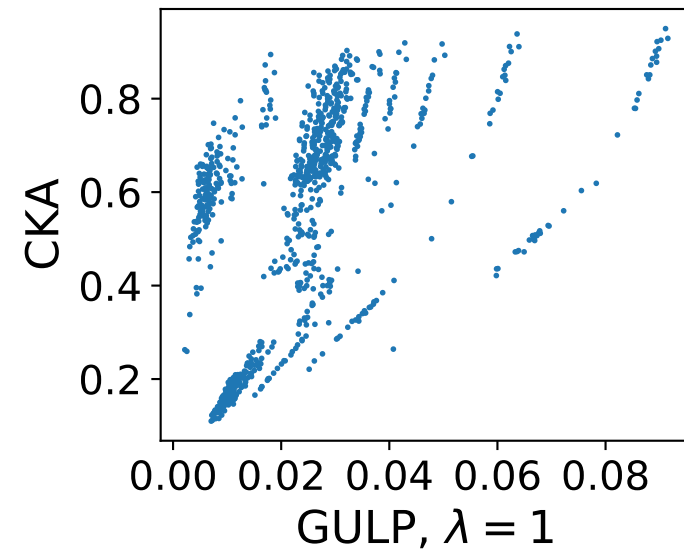

Supplement: supplementary_material [file attachment]

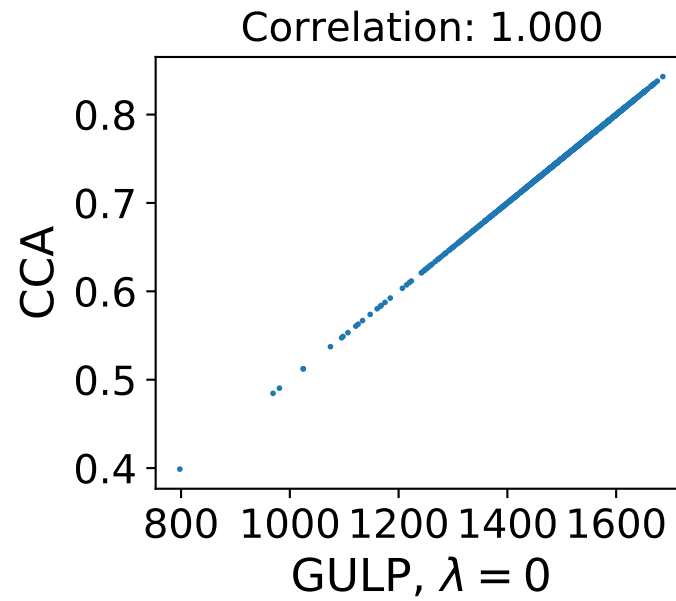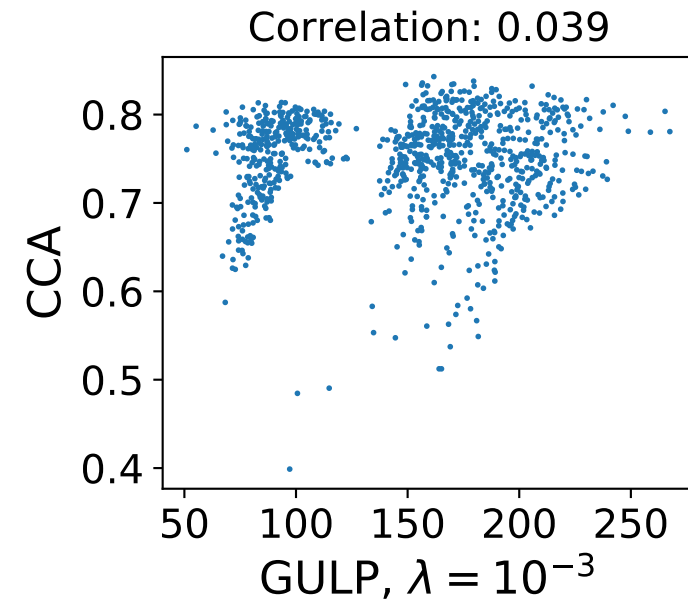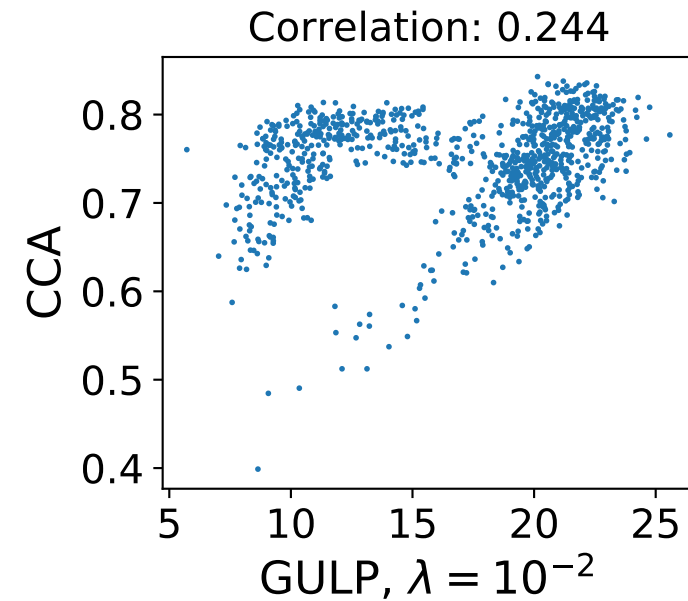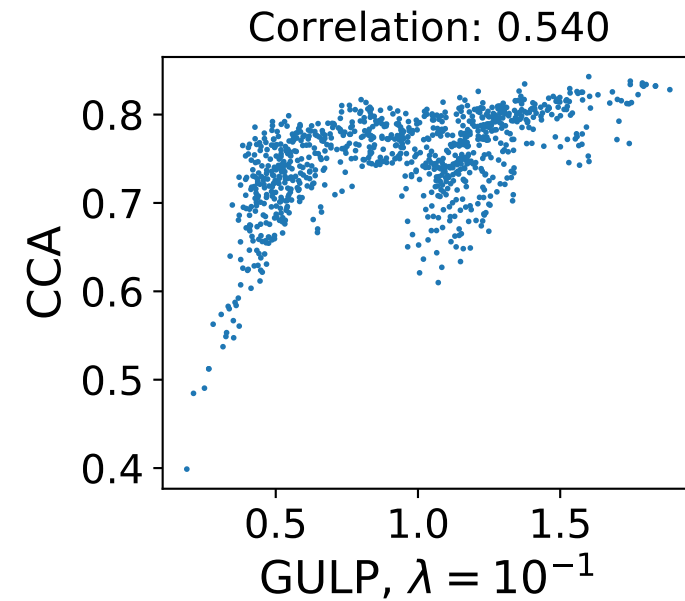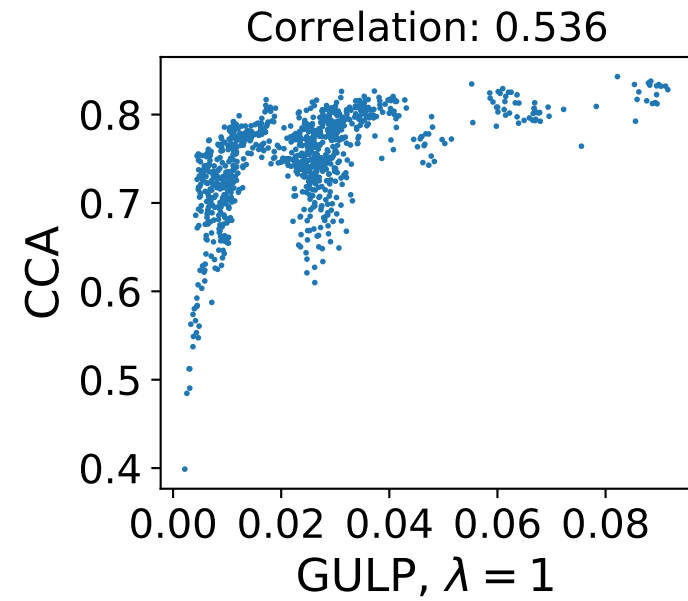

Supplement: supplementary_material [file attachment]

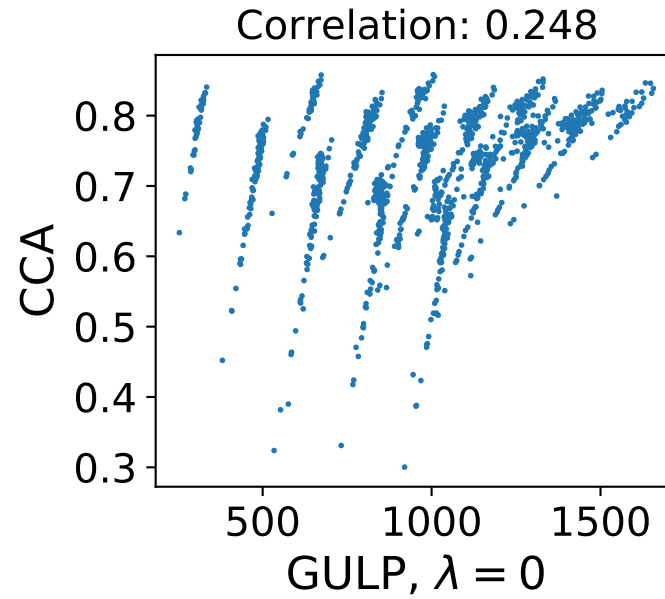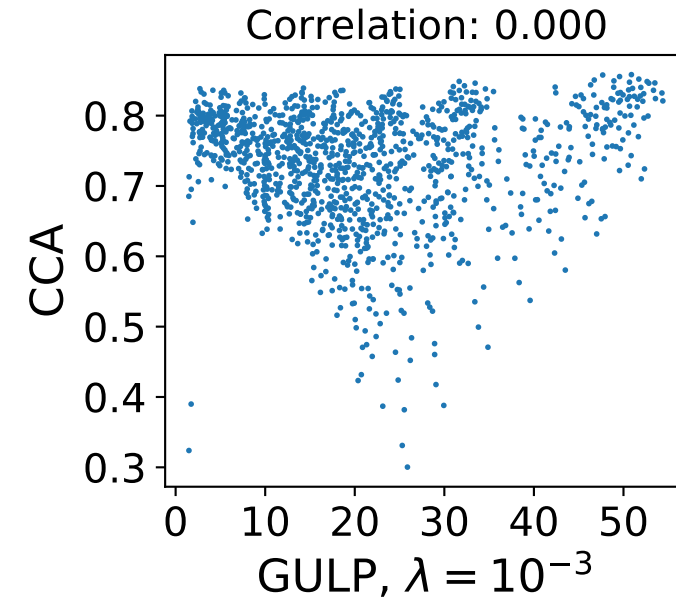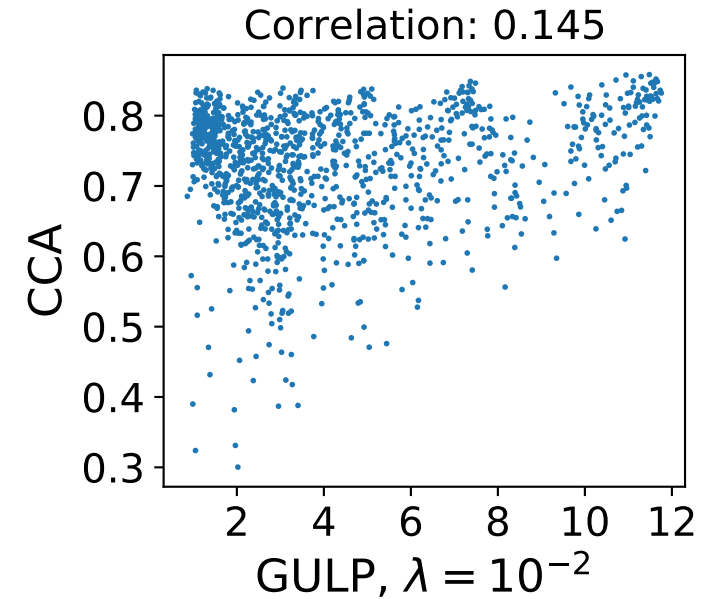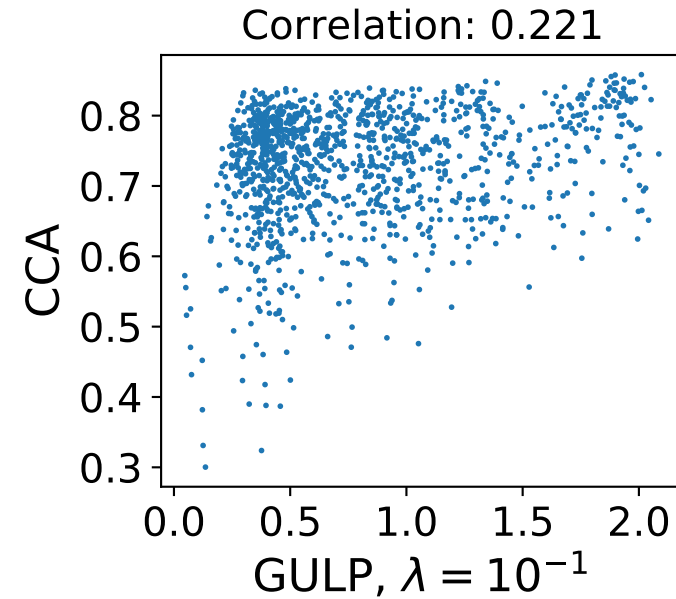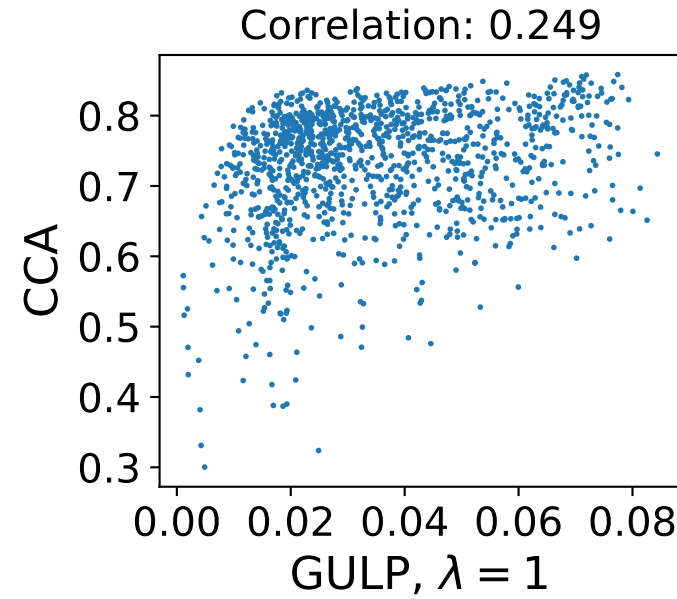

Supplement: supplementary_material [file attachment]
